# Supplementary material for: Self-Reported Physical Activity Is Associated With β-Cell Function in Mexican American Adults
Source: PubMed Central journal article supplement — Diabetes Care. 2013 Feb 13;36(3):638–44. doi: 10.2337/dc12-1485 (PMC3579363; doi:10.2337/dc12-1485), 2013-02-13
Supplement: supp_dc12-1485v121485_DC121485SupplementaryData.pdf [file supp_dc12-1485v121485_DC121485SupplementaryData.pdf]

SUPPLEMENTARY DATA

**Supplementary Table 1.** Comparison of metabolic traits across the three physical activity groups among men\*

| Traits                                                             | Low         | Moderate    | High        | P <sup>(1)</sup> |
|--------------------------------------------------------------------|-------------|-------------|-------------|------------------|
|                                                                    | (N=69)      | (N=173)     | (N=72)      |                  |
| Age (yrs)                                                          | 35.2 (1.2)  | 32.1 (0.6)  | 33.9 (1.0)  |                  |
| Body percent fat (%)                                               | 25.9 (0.7)  | 24.6 (0.5)  | 25.2 (0.6)  | 0.42             |
| BMI (kg/m <sup>2</sup> )                                           | 29.5 (0.8)  | 28.8 (0.4)  | 29.5 (0.7)  | 0.99             |
| Waist circumference (cm)                                           | 98.7 (1.9)  | 96.2 (1.0)  | 97.4 (1.7)  | 0.56             |
| Hip circumference (cm)                                             | 103.1 (1.6) | 102.6 (0.8) | 104.2 (1.3) | 0.55             |
| Waist-Hip ratio × 100                                              | 95.4 (0.7)  | 93.4 (0.4)  | 93.1 (0.7)  | 0.008            |
| Trunk fat (kg)                                                     | 12.1 (0.7)  | 11.5 (0.4)  | 12.1 (0.6)  | 0.99             |
| Fasting glucose (mmol/l)                                           | 5.1 (0.07)  | 5.1 (0.05)  | 5.2 (0.07)  | 0.35             |
| 2-hr glucose (mmol/l)                                              | 7.4 (0.27)  | 6.9 (0.15)  | 6.8 (0.21)  | 0.08             |
| Total glucose area (mmol/l × min)                                  | 953 (23)    | 933 (13)    | 939 (22)    | 0.67             |
| Incremental glucose area (mmol/l × min)                            | 336 (19)    | 324 (11)    | 318 (17)    | 0.48             |
| Fasting insulin (pmol/l)†                                          | 55 (5)      | 44 (2)      | 48 (4)      | 0.26             |
| 2-hr insulin (pmol/l)†                                             | 373 (33)    | 298 (21)    | 286 (31)    | 0.06             |
| Total insulin area (pmol/l × 10 <sup>-3</sup> min)†                | 52 (3)      | 48 (2)      | 49 (4)      | 0.55             |
| Incremental insulin area (pmol/l × 10 <sup>-3</sup> min)†          | 45 (3)      | 42 (2)      | 43 (4)      | 0.64             |
| Δ Insulin at 30 min (pmol/l)†                                      | 418 (31)    | 433 (21)    | 477 (44)    | 0.22             |
| S <sub>I</sub> (min <sup>-1</sup> per pmol/l × 10 <sup>-3</sup> )† | 2.19 (0.15) | 2.63 (0.11) | 2.43 (0.17) | 0.28             |
| AI <sub>Rg</sub> (pmol/l × 10 min)†                                | 3989 (444)  | 3734 (220)  | 4119 (372)  | 0.80             |
| DI†                                                                | 8166 (715)  | 9282 (453)  | 9398 (635)  | 0.20             |
| S <sub>G</sub> (min <sup>-1</sup> )†                               | 1.56 (0.06) | 1.74 (0.04) | 1.76 (0.09) | 0.049            |
| HDL (mg/dl)†                                                       | 39.4 (1.0)  | 42.0 (0.8)  | 40.7 (1.0)  | 0.34             |
| LDL (mg/dl)†                                                       | 103.8 (3.2) | 109.0 (2.8) | 108.6 (3.4) | 0.29             |
| Triglycerides (mg/dl)†                                             | 117.1 (8.6) | 108.4 (5.7) | 113.4 (8.5) | 0.77             |
| Cholesterol (mg/dl)†                                               | 171.3 (3.9) | 179.8 (2.9) | 177.6 (4.4) | 0.30             |
| Caloric intake (kcal/d)†                                           | 2280 (111)  | 2438 (81)   | 2455 (95)   | 0.21             |

\* Data are presented as age-adjusted mean (SEM) or geometric mean (SEM) for log-transformed variables

† log transformation was applied for data analysis

P-value <sup>(1)</sup>: P-value testing trend across groups adjusted for age.

SUPPLEMENTARY DATA

**Supplementary Table 2.** Comparison of metabolic traits across the three physical activity groups among women\*

| Traits                                                             | Low         | Moderate    | High        | P      |
|--------------------------------------------------------------------|-------------|-------------|-------------|--------|
|                                                                    | (N=432)     | (N=275)     | (N=131)     |        |
| Age (yrs)                                                          | 35.4 (0.4)  | 35.6 (0.5)  | 34.1 (0.6)  |        |
| Body percent fat (%)                                               | 38.4 (0.3)  | 38.3 (0.3)  | 38.3 (0.5)  | 0.72   |
| BMI (kg/m <sup>2</sup> )                                           | 30.0 (0.4)  | 29.7 (0.4)  | 29.5 (0.5)  | 0.33   |
| Waist circumference (cm)                                           | 93.7 (0.8)  | 92.3 (0.9)  | 92.8 (1.1)  | 0.28   |
| Hip circumference (cm)                                             | 107.9 (0.7) | 107.2 (0.8) | 107.6 (1.0) | 0.61   |
| Waist-Hip ratio × 100                                              | 86.9 (0.3)  | 86.3 (0.4)  | 86.0 (0.6)  | 0.11   |
| Trunk fat (kg)                                                     | 14.8 (0.3)  | 14.3 (0.4)  | 14.6 (0.5)  | 0.44   |
| Fasting glucose (mmol/l)                                           | 5.1 (0.04)  | 5.0 (0.04)  | 4.9 (0.06)  | 0.013  |
| 2-hr glucose (mmol/l)                                              | 7.7 (0.11)  | 7.8 (0.14)  | 7.2 (0.17)  | 0.07   |
| Total glucose area (mmol/l × min)                                  | 940 (10)    | 934 (12)    | 900 (17)    | 0.06   |
| Incremental glucose area (mmol/l × min)                            | 339 (8)     | 341 (10)    | 316 (14)    | 0.23   |
| Fasting insulin (pmol/l)†                                          | 52 (2)      | 49 (2)      | 42 (2)      | 0.002  |
| 2-hr insulin (pmol/l)†                                             | 431 (16)    | 433 (19)    | 374 (23)    | 0.10   |
| Total insulin area (pmol/l × 10 <sup>-3</sup> min)†                | 50 (1)      | 50 (2)      | 48 (2)      | 0.37   |
| Incremental insulin area (pmol/l × 10 <sup>-3</sup> min)†          | 44 (1)      | 43 (2)      | 42 (2)      | 0.58   |
| Δ Insulin at 30 min (pmol/l)†                                      | 392 (13)    | 390 (17)    | 396 (23)    | 0.95   |
| S <sub>I</sub> (min <sup>-1</sup> per pmol/l × 10 <sup>-3</sup> )† | 2.65 (0.07) | 2.60 (0.09) | 2.89 (0.13) | 0.19   |
| AIKg (pmol/l × 10 min)†                                            | 3211 (118)  | 3341 (161)  | 3538 (203)  | 0.14   |
| DI†                                                                | 8120 (278)  | 8151 (347)  | 9744 (499)  | 0.016  |
| S <sub>G</sub> (min <sup>-1</sup> )†                               | 1.64 (0.03) | 1.61 (0.04) | 1.66 (0.06) | 0.96   |
| HDL (mg/dl)†                                                       | 47.3 (0.6)  | 47.4 (0.6)  | 48.3 (0.9)  | 0.35   |
| LDL (mg/dl)†                                                       | 96.2 (1.4)  | 94.2 (1.6)  | 97.8 (2.3)  | 0.90   |
| Triglycerides (mg/dl)†                                             | 86.7 (2.8)  | 85.9 (3.0)  | 83.7 (4.1)  | 0.55   |
| Cholesterol (mg/dl)†                                               | 166.2 (1.6) | 163.6 (1.8) | 168.2 (2.4) | 0.90   |
| Caloric intake (kcal/d)†                                           | 2109 (39)   | 2287 (52)   | 2343 (66)   | 0.0003 |

\* Data are presented as age-adjusted mean (SEM) or geometric mean (SEM) for log-transformed variables

† Log transformation was applied for data analysis

P-value<sup>(1)</sup>: P-value testing trend across groups adjusted for age.
